# Supplementary material
Source: publisher figshare collection journal article supplement (https://f1000.figshare.com/ndownloader/files/231377)
Supplement: Supplementary file 1 [file 231377]

Primary inflorescence length (cm)
Phenotype Characterization of svt2 mutant line--primary inflorescence height (cm)
Planted 9/17/09		2 wks.	3 wks.	4 wks.	5 wks.
	replicate	10/1/2009	10/8/2009	10/15/2009	10/22/2009	Mean 4wks	SD 4wks	SE 4wks
col-0	1	0	buds visible	3.1	21.8
	2	0	buds visible	9.2	23.3
	3	0	buds visible	3.6	21.5
	4	0	buds visible	9.2	25.1
	5	0	buds visible	6.3	26.5
	6	0	buds visible	4.5	26.3
	7	0	buds visible	5.5	25
	8	0	buds visible	6.5	25.6
						5.99	2.31	0.82
svt2	1	0	no buds	buds visible (<0.3 cm)	9
	2	0	no buds	buds visible (<0.3 cm)	10.4
	3	0	no buds	buds visible (<0.3 cm)	10.8
	4	0	no buds	buds visible (<0.3 cm)	11
	5	0	no buds	buds visible (<0.3 cm)	8.4
	6	0	no buds	buds visible (<0.3 cm)	10.2
	7	0	no buds	buds visible (<0.3 cm)	9
	8	0	no buds	buds visible (<0.3 cm)	9.8
ler-0	1	0	0	2.5	12.7
	2	0	0.8	13	24.4
	3	0	0.7	13.9	25.2
	4	0	1.2	15	26.3
	5	0	0.3	12.1	20.8
	6	0	0.9	12.6	21.6
	7	0	0.6	12	20.9
	8	0	0.9	11.5	19
						11.58	3.84	1.36
vtc1-1	1	0	buds visible	10.8	9.4
	2	0	buds visible	6.5	26
	3	0	buds visible	7.9	26.4
	4	0	buds visible	6.1	24.4
	5	0	0.4	11.6	29.4
	6	0	buds visible	5	22.5
	7	0	0.4	12.5	27.2
	8	0	buds visible	6	23.3
						8.30	2.91	1.03
*measured only primary inflorescence
*svt2 M2 mutants have flowers that are roughly double the size of other genotypes
	Mean	SE
Col	5.99	0.82
vtc1	8.30	1.03
svt2	0.00	0.00
Ler	11.58	1.36
